# Production and Evaluation of a Recombinant Chimeric Vaccine against *Clostridium botulinum* Neurotoxin Types C and D

Luciana A. F. Gil<sup>1</sup>, Carlos Eduardo P. da Cunha<sup>2</sup>, Gustavo M. S. G. Moreira<sup>2</sup>, Felipe M. Salvarani<sup>3</sup>, Ronnie A. Assis<sup>3</sup>, Francisco Carlos F. Lobato<sup>3</sup>, Marcelo Mendonça<sup>2</sup>, Odir A. Dellagostin<sup>2</sup>, Fabricio R. Conceição<sup>2\*</sup>

**1** Faculdade de Veterinária, Universidade Federal de Pelotas, Pelotas, RS, Brazil, **2** Centro de Desenvolvimento Tecnológico, Núcleo de Biotecnologia, Universidade Federal de Pelotas, Pelotas, RS, Brazil, **3** Escola de Veterinária, Universidade Federal de Minas Gerais, Belo Horizonte, MG, Brazil

## Abstract

Bovine botulism is a fatal disease that is caused by botulinum neurotoxins (BoNTs) produced by *Clostridium botulinum* serotypes C and D and that causes great economic losses, with nearly 100% lethality during outbreaks. It has also been considered a potential source of human food-borne illness in many countries. Vaccination has been reported to be the most effective way to control bovine botulism. However, the commercially available toxoid-based vaccines are difficult and hazardous to produce. Neutralizing antibodies targeted against the C-terminal fragment of the BoNT heavy chain (H<sub>C</sub>) are known to confer efficient protection against lethal doses of BoNTs. In this study, a novel recombinant chimera, consisting of *Escherichia coli* heat-labile enterotoxin B subunit (LTB), a strong adjuvant of the humoral immune response, fused to the H<sub>C</sub> of BoNT serotypes C and D, was produced in *E. coli*. Mice vaccinated with the chimera containing LTB and an equivalent molar ratio of the chimera without LTB plus aluminum hydroxide (Al(OH)<sub>3</sub>) developed 2 IU/mL of antitoxins for both serotypes. Guinea pigs immunized with the recombinant chimera with LTB plus Al(OH)<sub>3</sub> developed a protective immune response against both BoNT/C (5 IU/mL) and BoNT/D (10 IU/mL), as determined by a mouse neutralization bioassay with pooled sera. The results achieved with guinea pig sera fulfilled the requirements of commercial vaccines for prevention of botulism, as determined by the Brazilian Ministry of Agriculture, Livestock and Food, Supply. The presence of LTB was essential for the development of a strong humoral immune response, as it acted in synergism with Al(OH)<sub>3</sub>. Thus, the vaccine described in this study is a strong candidate for the control of botulism in cattle.

**Citation:** Gil LAF, Cunha CEPd, Moreira GMSG, Salvarani FM, Assis RA, et al. (2013) Production and Evaluation of a Recombinant Chimeric Vaccine against *Clostridium botulinum* Neurotoxin Types C and D. PLoS ONE 8(7): e69692. doi:10.1371/journal.pone.0069692

**Editor:** Michel R. Popoff, Institute Pasteur, France

**Received:** December 21, 2012; **Accepted:** May 25, 2013; **Published:** July 31, 2013

**Copyright:** © 2013 Gil et al. This is an open-access article distributed under the terms of the Creative Commons Attribution License, which permits unrestricted use, distribution, and reproduction in any medium, provided the original author and source are credited.

**Funding:** CNPq (project 5.05.02.00-0), <http://www.cnpq.br/>. The funders had no role in study design, data collection and analysis, decision to publish, or preparation of the manuscript.

**Competing interests:** The authors have declared that no competing interests exist.

\* E-mail: [fabricio.rochedo@ufpel.edu.br](mailto:fabricio.rochedo@ufpel.edu.br)

## Introduction

Botulism is a severe and fatal disease characterized by flaccid paralysis due to the inhibition of acetylcholine release at the neuromuscular junction caused by the botulinum neurotoxins (BoNTs) produced by *Clostridium barati*, *C. butyricum*, *C. argentinense* and, most commonly, by *C. botulinum* [1], a Gram-positive anaerobe rod and spore-forming bacteria present in soil, water and decaying organic matter. There are seven serotypes of BoNTs (A–G) that vary antigenically, though they have the same pharmacological activity [2].

In many countries, including Brazil, BoNTs serotypes C and D are responsible for causing botulism in cattle [3–5]. Cattle with calcium and phosphorus deficiencies often resort to bone

chewing to supplement their lack of minerals, which is the main cause of endemic botulism [6]. Dutra et al. [7] reported seven outbreaks of bovine botulism in Brazil, which were associated with contaminated water and resulted in 99.92% lethality. In another study [8], the same authors reported more than seven outbreaks of bovine botulism due to contaminated bedding for poultry, resulting in 3,299 dead animals. More recently, Costa et al. [5] reported an outbreak of bovine botulism caused by serotypes C and D present in contaminated food, with 100% lethality in a dairy-producing property. Outbreaks of botulism have also been reported in Europe [9,10] and North America [11], where there is also great concern that infected animals will become a source of food-borne botulism for humans. Therefore, this disease is one of the main causes of cattle

death and, consequently, of great economic losses; in addition, it is a matter of concern for public safety worldwide.

Vaccination is the most effective method to prevent death via BoNT poisoning [12,13]. Current commercial vaccines are produced by inactivated native toxins (toxoids) combined with conventional adjuvants, which, although efficient, present some production limitations: (1) the amount of toxin produced *in vitro* is unpredictable, and (2) BoNTs are the most potent biological toxins known in nature [14], and therefore high levels of biosafety are required [13]. Thus, it is critical to develop new strategies that can overcome these problems.

BoNTs are synthesized as single polypeptide chain prototoxins and are activated by enzymatic cleavage by *C. botulinum* proteases [1]. The activated form of the toxins is composed of two chains and three characteristic domains. The light chain is a Zn<sup>2+</sup>-metalloprotease, which is connected to the N-terminal half of the heavy chain domain (translocation domain, H<sub>N</sub>) by a single disulfide bond [15]. The C-terminal region of the heavy chain (i.e., the binding domain to the neuronal receptor, H<sub>C</sub>) comprises the region that interacts with neurons. Additionally, the C-terminal region of the heavy chain is a nontoxic domain that possesses protective epitopes [16]. It has already been shown that subunit vaccines made of recombinant H<sub>C</sub>, produced in either *Escherichia coli* or *Pichia pastoris*, are capable of inducing neutralizing antibodies and protection against botulism [12,17–21]. Consequently, recombinant subunit vaccines are interesting strategies to solve the problems inherent to toxoid vaccine production.

Chimeric proteins carrying epitopes from different pathogens, linkers, or adjuvant sequences offer increased immunogenicity for recombinant antigens and can also elicit broad immune responses [22–24]. In this study, using only one fermentative and downstream process, we developed a chimeric vaccine, consisting of the H<sub>C</sub> region of BoNTs serotypes C and D fused to the B subunit of the *Escherichia coli* heat-labile enterotoxin (LTB), a potent adjuvant of the humoral immune response [25,26]. We then further evaluated the immunogenicity of this vaccine in animal models.

## Material and Methods

### Ethics statement

This study was carried out in strict accordance with the recommendations of the Conselho Nacional de Controle de Experimentação Animal (CONCEA). The protocol was approved by the Committee on the Ethics of Animal Experiments of the Federal University of Pelotas (Permit No. 9286). All efforts were made to minimize animal suffering.

### Native botulinum neurotoxins and standard sera against botulinum neurotoxins serotypes C and D

Native botulinum neurotoxins were produced by *Clostridium botulinum* serotypes C strain Onderstepoort Veterinary Institute 01/1992 and D strain Onderstepoort Veterinary Institute 02/1992 obtained from the Onderstepoort Veterinary Institute (South Africa) standardized to 1 L+/mL. Standard sera against BoNTs serotypes C and D were obtained from the Center for

**Table 1.** Specifications regarding restriction enzymes, gene fragments and chimera characteristics.

| Recombinant chimera                    | Restriction enzymes <sup>a</sup> | Expression vector | Insert                               | Fragment length (pb) | Molecular mass (kDa) <sup>b</sup> |
|----------------------------------------|----------------------------------|-------------------|--------------------------------------|----------------------|-----------------------------------|
| rLTB/H <sub>C</sub> C/H <sub>C</sub> D | <i>Xho</i> I and <i>Hind</i> III | pAE// <i>l</i> tb | <i>h<sub>c</sub>c/h<sub>c</sub>d</i> | 2562                 | 112.4                             |
| rH <sub>C</sub> C/H <sub>C</sub> D     | <i>Kpn</i> I and <i>Hind</i> III | pAE               | <i>h<sub>c</sub>c/h<sub>c</sub>d</i> | 2568                 | 100.0                             |

<sup>a</sup> Purchased from New England Biolabs

<sup>b</sup> Predicted by Vector NTI Advance 11 (Invitrogen)

Diseases Control (CDC) lot 76.0342 catalog number BS0612 and lot 76.0338 catalog number BS0611, respectively.

### Gene synthesis and cloning

A synthetic gene encoding the fused H<sub>C</sub> of BoNT serotypes C and D (H<sub>C</sub>C/H<sub>C</sub>D) was synthesized by Epoch Biolabs, Inc. (USA) with optimal codon usage for *E. coli*. The protein sequences of H<sub>C</sub>C (gi:115185) and H<sub>C</sub>D (gi:115188) were used as reference to design the gene. Restriction sites were added to allow cloning into the pAE and pAE//*l*tb expression vectors [25] for *E. coli* (Table 1). A three-glycine linker (3xGly) was added between the two H<sub>C</sub>s to enable the proper folding of each H<sub>C</sub>. DNA manipulation was performed according to the protocols previously described by Sambrook and Russel [27]. Briefly, after digestion, electrophoresis on an agarose gel was performed. Bands representing the fragments encoding proteins of interest and expression vectors were purified from the gel or digestion reactions, respectively, using the Gel Band Purification Kit (GE Healthcare) and illustra GFX PCR DNA. After purification, the inserts and vectors were quantified and ligated with T4 DNA ligase (New England Biolabs). The ligation products were used to transform *E. coli* TOP10, which were cultured overnight on LB agar plates with 100 µg/mL ampicillin. Bacterial clones were screened for recombinants. Plasmid DNA was extracted using the alkaline lysis method [27], and recombinant clones were characterized by endonuclease digestion. The gene sequence with optimized codons and its translation are represented in Figure 1.

### Expression and purification of the recombinant chimeras

The recombinant vectors were transformed into *E. coli* BL21 (DE3) Star by heat shock method [27]. Bacteria transformed with each recombinant vector were grown in Luria-Bertani (LB) broth supplemented with 100 µg/mL of ampicillin in a shaker (37 °C, 150 RPM) until the mid-log growth phase (OD<sub>600</sub>=0.6–0.8). Heterologous protein expression was induced for 3 h by the addition of isopropyl β-D-1-thiogalactopyranoside (IPTG) to a final concentration of 0.5 mM. The cells were harvested by centrifugation (16,000 x g, 10 min, 4 °C), suspended in lysis buffer (0.2 M NaH<sub>2</sub>PO<sub>4</sub>, 0.5 M NaCl, 10 mM imidazole), incubated with 50 µg/mL of lysozyme for 1 h at room temperature, disrupted by sonication and centrifuged again (10,000 x g, 30 min, 4 °C). The pellets with inclusion

↗ Start of the LTB sequence

M H H H H H H L E G S M A P Q S I T E L C S E Y R N T Q I  
1 ATGCATCACCATCACCATCACCTCGAGGGATCC**ATGG**CTCCTCAGTCTATTACAGAACTATGTCGGAATATCGCAACACACAATA  
Y T I N D K I L S Y T E S M A G K R E M V I I T F K S G A  
88 TATACGATAAATGACAAGATACTATCATATACGGAATCGATGGCAGGCAAAAGAGAAATGGTTATCATTACATTTAAGAGCGCGCA  
T F Q V E V P G S Q H I D S Q K K A I E R M K D T L R I T  
175 ACATTTTCAGGTCGAAGTCCCGGGCAGTCAACATATAGACTCCCAAAAAAAGCCATTGAAAGGATGAAGGACACATTAAGAATCACA  
Y L T E T K I D K L C V W N N K T P N S I A A I S M E N G  
262 TATCTGACCAGACAAAATGATAAATATGTGTATGGAATAATAAAACCCCAATTC AATTGCGGCAATCAGTATGAAAAACGGT

↗ Start of the H<sub>c</sub>C sequence

T L E Y F N N I N D S K I L S L Q N R K N T L V D T S G Y  
349 ACCCTCGACT**TACT**TTCAATAATATTAATGATAGCAAAATTCAGTCTGCAGAATCGCAAGAATACTCTGGTCGATACAAGTGGTTAT  
N A E V S E E G D V Q L N P I F P F D F K L G S S G E D R  
436 AATGCCGAGGTGAGCGAAGAAGGCGATGTCCAGTGAATCCGATCTTCCCATTTGACTTCAAGCTGGGCAGCAGTGGTGAAGATCGC  
G K V I V T Q N E N I V Y N S M Y E S F S I S F W I R I N  
523 GGCAAGTAATCGTGACCCAGAATGAGAATCGTCTATAACAGCATGTATGAATCTTTTAGCATTAGCTTTTGGATTCCGATTAAAT  
K W V S N L P G Y T I I D S V K N N S G W S I G I I S N F  
610 AAATGGGTGAGCAATCTGCCGGTATACGATTATCGAGTGAAGATAACAGCGGGTGGAGTATCGGCATCAGTAACTTC  
L V F T L K Q N E D S E Q S I N F S Y D I S N N A P G Y N  
697 CTGGTCTTTACGCTGAAGCAGAACGAAGATTCGAACAGAGCATCAACTTTAGTTATGACATTAGTAAACAATGCTCCGGGCTACAAT  
K W F F V T V T N M M G N M K I Y I N G K L I D T I K V  
784 AAGTGGTTCCTCGTGACCGTGACTAATAACATGATGGGTAACATGAAAAATTTATATTAACGGGAAACTGATTGACACCATCAAGGTG  
K E L T G I N F S K T I T F E I N K I P D T G L I T S D S  
871 AAAGAAGTACCGGCATCAACTTCAGTAAGACGATCACATTTGAGATCAATAAGATCCCGGATACGGGCTGATCACTTCTGATAGC  
D N I N M W I R D F Y I F A K E L D G K D I N I S L  
958 GATAACATCAACATGTGGATTCGTGATTTCTATATCTTCGCTAAAGAACTGGACGGCAAGACATTAATATTCTGTTAACTCTCTG  
Q Y T N V V K D Y W G N D L R Y N K E Y Y M V N I D Y L N  
1045 CAATTAACCAAGTGTGAAAGATTTGGGGTAATGATCTGCGCTATAATAAGAGTACTACATGGTAACATCAGTATTCGTAAC  
R Y M Y A N S R Q I V F N T R R N N N D F N E G Y K I I I  
1132 CGCTATATGATGCGAACAGCCGTCAAAATGATTTAAACACAGCCGTAACAATAATGACTTTAATGAAGGGTATAAAAATATCATC  
K I R G N T N D T R V R G G D I L Y F D M T I N N K A Y  
1219 AAACGTATCCGTGGCAATACTAACGATACCCGCGTTCGCGGTGGGACATCCTGACTTCGACATGACGATTAATAAACAAGCGTAT  
N L F M K N E T M Y A D N H S T E D I Y A I G L R E Q T K  
1306 AACCTGTTATGAAGAAGCAAACTATGTACGCAGACAACCATAGCACCCGAGGATATTTACGCGATTGGCCTGCGTGAACAACGAAA  
D I N D N I I F Q I Q P M N N T Y Y Y A S Q I F K S N F  
1393 GATATTAATGATAATATTATCTTTCAGATTCAACCAATGAATAATACCTATTATTACGCATCTCAGATCTTCAATCTAACTTCAAT  
G E N I S G I C S I G T Y R F R L G G D W Y R H N Y L V P  
1480 GGTGAAAACATTTCTGGGATTTGCTCTATTGGTACATACCGTTTTCTGCTGGGTGGTATTGGTATCGTCACAACTACCTGGTTCTCT  
T V K Q G N Y A S L L E S T S T H W G F V P V S E G S G G  
1567 ACAGTTAAACAAGGTAAGTACGCCAGCCTGCTGGAATCTACCTACCCATTGGGTTTTGTTCTGTTTCTGAGGGATCCGTTGGC

↗ Start of the H<sub>c</sub>D sequence

G E F F N S I N D S K I L S L Q N K K N A L V D T S G Y N  
1654 GGTGAATTC**TTC**CAATTCATCAACGACAGCAAAATCCTGAGTCTGCAAAATAAGAAGATGCAGTGGTCGACACTTCTGGCTATAAT  
A E V R V G D N V Q L N T I Y T N D F K L S S S G D K I I  
1741 GCTGAGGTTCTGTCGGTGACAACGTCAGCTCAATACCATCTACACCAACGATTTCAAACTGAGTAGCAGTGGTGAATAAAATCATC  
V N L N N N I L Y S A I Y E N S S V S F W I K I S K D L T  
1828 GTCAACCTGAATAACAATATTCTGTACTCTGCGATATGAAAACAGTTCTGTGAGCTTCTGGATTAAATCAGCAAAGATCTGACA  
N S H N E Y T I I N S I E Q N S G W K L C I R N G N I E W  
1915 AACAGCCATAATGAATATACTATTATTAATAGCATCGAGCAGAATCTGGCTGGAAGCTGTGATTTCGTAACGGGAACATTGAATGG  
I L Q D V N R K Y K S L I F D Y S E S L S H T G G Y T N K W  
2002 ATTTGCAAGACGTGAATCGTAATATAAGAGTCTGATCTTTGACTATTCTGAAAGTCTGCTCACACAGGGTACACGAACAATGG  
F F V T I T N N I M G Y M K L Y I N G E L K Q S K I E D  
2089 TTCTTTGTGACCATCACAATAACATCATGGGTATATGAAACTGTACATTAATGGTGAAGTAAACAGTCTCAGAAAATGAAGAC  
L D E V K L D K T I V F G I D E N I D E N Q M L W I R D F  
2176 CTGGATGAAGTTAAGCTGGACAAGACCATTTGTTGGCATCGACGAGAAATATCGATGAGAACCAGATGCTGTGGATTCCGCGATTTT  
N I F S K E L S N E D I N I V Y E G Q I L R N V I K D Y W  
2263 AATATCTTTAGCAAAGAGCTGTCTAATGAAGATTAATATCGTTTACGAAGGCCAAATCCTGCGTAATGTTATCAAGGACTATTGG  
G N P L K F D T E Y I I N D N Y I D R Y I A P E S N V L  
2350 GGCAATCCGCTGAAATTCGATACAGAGTACTATATCATTAACGATAATTAATTTAGCCGCTACATCGCCGAGAAAGTAACTGCTG  
V L V Q Y P D R S K L Y T G N P I T I K S V S D K N P Y S  
2437 GTTCTGGTACAGTATCCTGATCGCAGCAAACTGTATACCGCAACCCGATCACTATCAAAGTGTGAGCATAAGAATCCTTACAGC  
R I L N G D N I I L H M L Y N S R K Y M I I R D T D T I Y  
2524 CGCATTCTGAACGGCGATAATATTTCTGCATATGCTGTACAATTTCTCGCAAAATATGATTATTCGCGATACCGATACAATTTAT  
A T Q G G E C S Q N C V Y A L K L Q S N L G N Y G I G I F  
2611 GCGACCCAGGGCGGGAGTGTAGTCAAAATTCGCTGTACGCCTGAAACTGCAATCTAACCTGGGTAACACGATTTGGTATTTTC  
S I K N I V S K N K Y C S Q I F S S F R E N T M L L A D I  
2698 TCTATTAAGAACATTGAAGCAAGAACAATATTCGACCCAGATCTTTAGCAGCTTTCTGTAAGAACACGATGCTGCTGGCTGATTT  
Y K P W R F S F K N A Y T P V A V T N Y E T K L L S T S S  
2785 TATAAACCATGGCGTTTTAGTTTCAAGAACCCATACCGCGGTAGCCGTAACGAAGTATGAAACGAACTGCTGAGTACTAGCAGC  
F W K F I S R D P G W V E \*  
2872 TTTTGGAAATTTATTAGCCGTGATCCGGTTGGTTGAGTGA

**Figure 1. Gene sequence and translation of the synthesized *ltb/h<sub>c</sub>C/h<sub>c</sub>D* construct.** Representation of the synthetic gene which encodes rLTB/H<sub>c</sub>C/H<sub>c</sub>D protein. The first codon of each subunit is in bold and identified by an arrow. The 3xGly linker codons are underlined. Stop codon is indicated by an asterisk (\*).

doi: 10.1371/journal.pone.0069692.g001

bodies were washed three times with lysis buffer and incubated overnight at 4 °C with lysis buffer supplemented with 0.2% or 0.4% (w/v) N-lauroylsarcosine (NLS) and centrifuged again (10,000  $\times$  g, 30 min, 4 °C). The recombinant proteins were purified by affinity chromatography, using HisTrap™ HP 1 ml columns Ni Sepharose™ on the ÄKTAprime™ automated liquid chromatography system (GE Healthcare), according to the manufacturer's instructions. Purified fractions were dialyzed against phosphate buffered saline (PBS, pH 7.4) with 0.05% (v/v) Triton X-100 overnight and lyophilized until further use. Protein quantification was performed using the BCA™ Protein Assay (Pierce). The purity and integrity of the recombinant antigens were evaluated by 12% SDS-PAGE.

### Characterization of the recombinant chimeras

Approximately 5  $\mu$ g of each of the purified proteins were run in SDS-PAGE 12% and then transferred to a Hybond-ECL nitrocellulose membrane (GE Healthcare) using Tris-Glycine transfer buffer (Tris 25 mM, Glycine 0.2 M, methanol 20% [v/v]) for 1 h under 100 V and approximately 400 mA. The membrane was blocked for 1 h at room temperature with non-fat dry milk 5% (w/v) diluted in PBS with 0.05% (v/v) Tween 20 (PBS-T). The membrane was incubated with mouse monoclonal anti-polyHistidine antibody (Sigma-Aldrich) diluted 1:6,000 in PBS-T for 1 h at room temperature. Rabbit anti-mouse IgG antibody conjugated with peroxidase (Sigma Aldrich) was diluted 1:4,000 in PBS-T and used as secondary antibody. The membrane was incubated the same way as before and revealed by chemiluminescent assay using ECL Western blotting substrate (Thermo Scientific) according to manufacturer's instructions. After each incubation step, three washes were performed with PBS-T in order to eliminate residual reagents.

The ELISA was performed to evaluate the antigenicity of the chimeras. At each step, plates were incubated for 1 h at 37 °C. Flat-bottom 96-well plates (Nunc) were coated with 200 ng per well of rLTB/H<sub>C</sub>C/H<sub>C</sub>D diluted in coating buffer (carbonate-bicarbonate 0.2 M, pH 9.7). The other antigens were added at the same molar ratio. Plates were blocked with non-fat dry milk 5% (w/v) diluted in PBS-T. The standardized anti-toxin C or D sera were diluted in PBS-T to 1 IU/mL and rabbit anti-cholera toxin antibody (Sigma Aldrich) was diluted 1:4,000 before they were applied to the plates. Rabbit anti-sheep IgG (1:4,000 in PBS-T) and goat anti-rabbit IgG (1:6,000 in PBS-T), both conjugated with horseradish peroxidase (Sigma Aldrich), were added to wells containing standard sera and anti-cholera toxin, respectively. Finally, 100  $\mu$ L of substrate solution (phosphate-citrate 0.1 M; pH 4.0) containing 0.4 mg/mL o-phenylenediamine and 0.1% (v/v) H<sub>2</sub>O<sub>2</sub> were added to each well and incubated for 15 min at room temperature in the dark. The plates were measured for its absorbance at 450 nm in plate reader spectrophotometer (Thermo, Plate).

### Mice and guinea pig vaccination

Female Swiss Webster mice, 6 to 8 weeks old, were randomly segregated into 5 groups of 10 animals each. Group one was comprised of animals vaccinated with 50  $\mu$ g of rLTB/H<sub>C</sub>C/H<sub>C</sub>D without conventional adjuvant to evaluate the

potential of rLTB as a humoral immune response adjuvant. Group two was comprised of animals vaccinated with 50  $\mu$ g of rLTB/H<sub>C</sub>C/H<sub>C</sub>D plus a 15% aluminum hydroxide suspension (Al(OH)<sub>3</sub>). Group three was comprised of animals vaccinated with the same molar ratio of rH<sub>C</sub>C/H<sub>C</sub>D plus 15% Al(OH)<sub>3</sub>. Group four was comprised of animals vaccinated with a commercial toxoid vaccine; the dose used was one-twentieth of the dose recommended for cattle. Group five (control group) was comprised of animals vaccinated with 200  $\mu$ L sterile PBS. Three doses were administered intraperitoneally on days 0, 14 and 28. Blood samples were collected on day 35 from the retro-orbital plexus, and sera were separated by centrifugation (7 min; 3,000  $\times$  g), pooled and frozen until further use.

Guinea pigs were vaccinated subcutaneously on days 0 and 21 with 200  $\mu$ g of each chimera. The groups, each with 10 randomly sorted animals, were the same as those described above for the experiments in mice. Blood samples were collected directly from the heart on day 42, and sera were separated as previously described and used for a mouse neutralization bioassay.

### Evaluation of the humoral immune response

The humoral immune responses of the mice and guinea pigs were evaluated by a mouse neutralization bioassay performed in accordance with the Brazilian Ministry of Agriculture, Livestock and Food Supply in its ministerial directive n. 23 [28]. Briefly, 1 L+ of each standardized native toxin was incubated for 60 min at 37 °C with 1 mL of undiluted and diluted (1:2, 1:3, 1:5, 1:10 and 1:20) pooled sera containing neutralizing antibodies. 1 L+ is the minimal dose of toxin that, when incubated with 1 IU/mL of standard antiserum, is still able to kill the whole mice population. After the incubation period, two mice, weighting 18 to 22 g, were inoculated intravenously and observed for 72 h, with survival checked every 24 h. The titers, expressed in international units per mL (IU/mL), were directly calculated as the minor dilution of serum that, even after incubation with 1L+ of BoNT, is still capable of killing the inoculated mice.

### Statistical analyses

Statistix9 (Analytical Software) was used to perform ANOVA and Tukey's test to analyze antigenicity and establish significant differences in the ELISA results.

### Results

#### Vector construction and the expression and purification of recombinant chimeras

The synthetic gene encoding for H<sub>C</sub>C and H<sub>C</sub>D (Fig. 2A), cloned by Epoch Biolabs Inc. (USA) into the pUC19 cloning vector, was digested with endonucleases to release a fragment encoding both chimeras together (Figure 2B and 2C). These genes were cloned into either the pAE/*lfb-h<sub>C</sub>-h<sub>C</sub>d* and pAE/*h<sub>C</sub>-h<sub>C</sub>d*. Digestion with endonucleases confirmed the correct cloning of each construct. Thereafter, *E. coli* BL21 (DE3) Star transformed with pAE/*lfb-h<sub>C</sub>-h<sub>C</sub>d* or pAE/*h<sub>C</sub>-h<sub>C</sub>d*

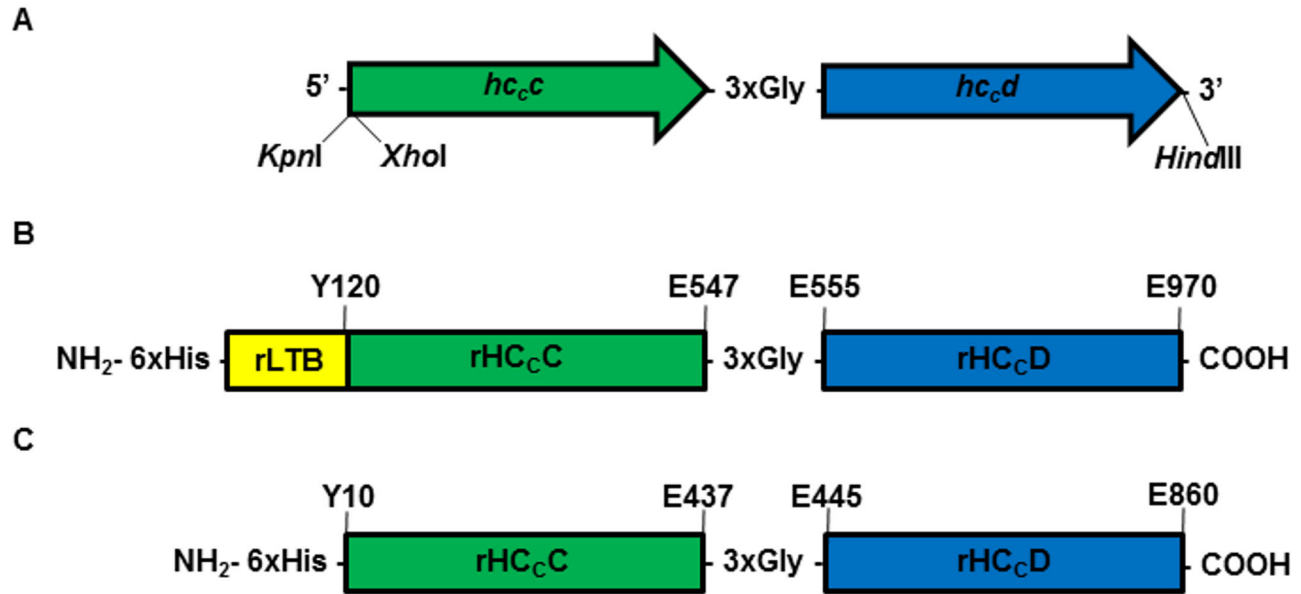

**Figure 2. Schematic representations of the constructed gene and fusion proteins.** (A) Structure of the gene designed to encode the fusion antigens. The  $hc_c$  (green) is flanked by  $KpnI$  and  $XhoI$  sites, respectively, at the 5' end. The coding sequence of  $hc_d$  (blue) is linked at the 3' end of  $hc_c$  by three Glycine codons and is flanked by  $HindIII$  at the 3' end. (B) Representation of the recombinant chimera region, followed by the adjuvant rLTB connected to rH<sub>c</sub>C, a three-Glycine linker (3xGly) and the rH<sub>c</sub>D at the C-terminal region. (C) Representation of the recombinant chimera rH<sub>c</sub>C/rH<sub>c</sub>D. The resulting protein has the same characteristics as shown in B, except for the absence of the rLTB sequence connected to the N-terminal region of HC<sub>c</sub>C.

doi: 10.1371/journal.pone.0069692.g002

expressed recombinant proteins of approximately 112 and 100 kDa, respectively, which were the expected molecular weights; however, additional bands with lower molecular weights than expected were also present (Figure 3A and 3B). The additional bands are likely to be truncated proteins because they all reacted with anti-polyHistidine in a Western blot analysis (Figure 3C). Both chimeras were obtained as inclusion bodies and were efficiently solubilized in lysis buffer containing 0.4% and 0.2% NLS, respectively. The one-step refolding process using PBS with 0.05% Triton X-100 did not interfere with protein solubility, since aggregates were not observed. Using this process, it was possible to achieve up to 100 mg of purified recombinant antigen per liter of culture.

#### Recombinant chimeras are recognized by standard sera

Recombinant chimeras were characterized with ELISAs using standard sera containing anti-BoNTs serotypes C and D and anti-cholera toxin. The ELISAs showed positive reactions of anti-BoNT/C, anti-BoNT/D and anti-CT against rLTB/H<sub>c</sub>C/H<sub>c</sub>D. As expected, rH<sub>c</sub>C/H<sub>c</sub>D did not react only with anti-CT. Furthermore, the negative control (crude protein extract of *E. coli* BL21 (DE3) Star) did not react with any sera. Additionally, the standard sera anti-BoNT/C and anti-BoNT/D did not react with rLTB (Figure 4). These results indicate that all domains of the recombinant chimeras are antigenic because they were recognized by standard sera and were significantly different from the negative controls ( $p < 0.001$ ).

#### Recombinant chimeras are innocuous and elicit neutralizing antitoxins

Neither mice nor guinea pigs vaccinated with recombinant chimeras presented abnormal responses or lesions at their vaccination sites, indicating the safety of both recombinant chimeras. Sera samples collected from vaccinated animals were used to evaluate the humoral immune response. The mouse neutralization bioassay results from both mice and guinea pigs are presented in Table 2. In both experiments, rLTB/H<sub>c</sub>C/H<sub>c</sub>D plus Al(OH)<sub>3</sub> resulted in the best vaccination strategy. Pooled sera from the mice contained 2 IU/mL antibodies against both C and D toxins. Pooled sera from the guinea pigs contained 5 IU/mL and 10 IU/mL antibodies against toxins C and D, respectively. In mice, the other constructs elicited less than 2 and 1 IU/mL antibodies against C and D, respectively. Similarly, in guinea pigs, the other antigens elicited less than 1 IU/mL antibodies against both toxins. The commercial vaccine tested in mice was only effective against BoNT serotype C, whereas in guinea pigs, it elicited the expected antibody levels for both serotypes. The vaccination of guinea pigs with rLTB/H<sub>c</sub>C/H<sub>c</sub>D plus Al(OH)<sub>3</sub> met the requirements of the Brazilian Ministry of Agriculture, Livestock and Food Supply in its ministerial directive N°.23 [28] and induced at least two times more antitoxins against BoNT serotype D than the commercial vaccine.

The formulations with only rLTB or Al(OH)<sub>3</sub> as single adjuvants induced low levels of neutralizing antibodies. In contrast, vaccination using both rLTB and Al(OH)<sub>3</sub> induced high



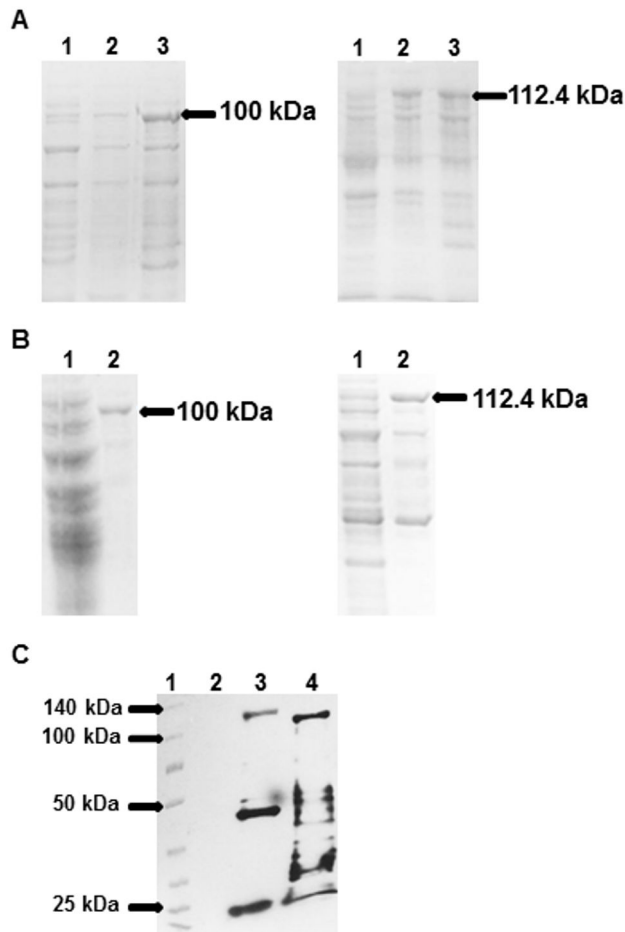

**Figure 3. SDS-PAGE and Western blot analysis of protein expression and purification.** (A) SDS-PAGE of the whole *E. coli* cell extract after 3 h of induction of both constructs. Left, 1: Untransformed *E. coli* BL21 (DE3) Star; 2: *E. coli* BL21 (DE3) Star transformed with pAE/*h<sub>c</sub>c-h<sub>c</sub>d* before induction; 3: *E. coli* BL21 (DE3) Star transformed with pAE/*h<sub>c</sub>c-h<sub>c</sub>d* after induction. Right, 1: Untransformed *E. coli*/BL21 (DE3) Star; 2: *E. coli* BL21 (DE3) Star transformed with pAE/*ltb-h<sub>c</sub>c-h<sub>c</sub>d* before induction; 3: *E. coli* BL21 (DE3) Star transformed with pAE/*ltb-h<sub>c</sub>c-h<sub>c</sub>d* after induction. (B) SDS-PAGE to evaluate the purity and integrity of purified proteins after Ni-affinity chromatography. Left, rH<sub>c</sub>C. Right, rH<sub>c</sub>D. All lanes designated "1" are untransformed *E. coli* BL21 (DE3) Star, and the lanes designated "2" are the purified antigens. (C) Anti-his Western blot to characterize the purified proteins. 1: Spectra Multicolor Broad Range Protein Ladder (Thermo Scientific), 2: Untransformed *E. coli* BL21 (DE3) Star, 3: rLTB/H<sub>c</sub>C/H<sub>c</sub>D, 4: rH<sub>c</sub>C/H<sub>c</sub>D.

doi: 10.1371/journal.pone.0069692.g003

levels of antitoxins. Clearly, there is a synergism between rLTB and Al(OH)<sub>3</sub>, which is important for the induction of a stronger humoral immune response against the two analyzed BoNTs.

## Discussion

Botulism in cattle has been the cause of great economic losses in the past years [5,7,8], with reports indicating that it is a potential source of food-borne botulism in humans [9,10]. This disease is therefore considered a widespread problem for both livestock production and human health. Currently, toxoids used to vaccinate animals are produced by *C. botulinum* fermentation and the further inactivation of produced toxins by formaldehyde. These procedures result in a non-predictable process that involves high biological risks because the native BoNTs are the most potent toxins known to humans [29]. Additionally, residual formaldehyde may affect the vaccine's safety [17]. The strategy utilized by our group overcomes these problems because heterologous protein expression in *E. coli* can be highly regulated, and the H<sub>c</sub> domain of the BoNTs is non-toxic, thus eliminating risks to workers during vaccine production.

We developed a bivalent recombinant vaccine with only one fermentative and downstream process, thereby facilitating vaccine production by avoiding additional fermentation steps. Most studies using *E. coli* to produce recombinant H<sub>c</sub> domains yield an average of 40 mg/L, except when a production optimization procedure is performed [30]. When only H<sub>c</sub>C and H<sub>c</sub>D production is considered, the yield average is higher, reaching 70 mg/L-culture [13,18,31,32]. The expression strategy we employed was able to produce up to 100 mg of recombinant protein per liter of culture, indicating high expression efficiency. Thus, considering the previously reported expression yield for individual H<sub>c</sub>s, our chimeras exhibit a more effective production system for vaccines, with only one bioprocess needed to produce what would normally require at least 4 different fermentation steps. An attempt to optimize the expression of rLTB/H<sub>c</sub>C/H<sub>c</sub>D using the same parameters as described by Yari et al. [33] in modified M9 medium did not interfere with the protein yield or the protein solubility (data not shown).

Our mouse and guinea pig vaccination results demonstrated that both fused constructs did not cause adverse side effects and are capable of inducing neutralizing antibodies (Table 2). These results were expected because the H<sub>c</sub> domains of BoNTs are non-toxic and capable of inducing protection against botulism [18]. Although the fusion of H<sub>c</sub>C, H<sub>c</sub>D and LTB might eliminate a few important protective epitopes, the immune responses of the mice and guinea pigs suggest that some epitopes were still present, thereby allowing the generation of immunity to botulism. Although a linker consisting on 3xGly was added between rH<sub>c</sub>C and rH<sub>c</sub>D, it is possible that the conformational epitopes of rH<sub>c</sub>C could not fold properly when compared to rH<sub>c</sub>D, which is flanked only by rH<sub>c</sub>C. This is possible because H<sub>c</sub>D elicited higher neutralization titers than H<sub>c</sub>C in guinea pigs. Three glycine residues were chosen because this amino acid has no side chain and thus confers flexibility between the domains, allowing the correct protein folding of each one. In fact, previous studies have described the effective use of glycine-rich linkers, such as (Gly<sub>4</sub>Ser)<sub>3</sub> and (Gly-Ser-Gly)<sub>2</sub>, even in vaccine studies due to the flexibility of glycine [34–39]. These linkers are larger than the

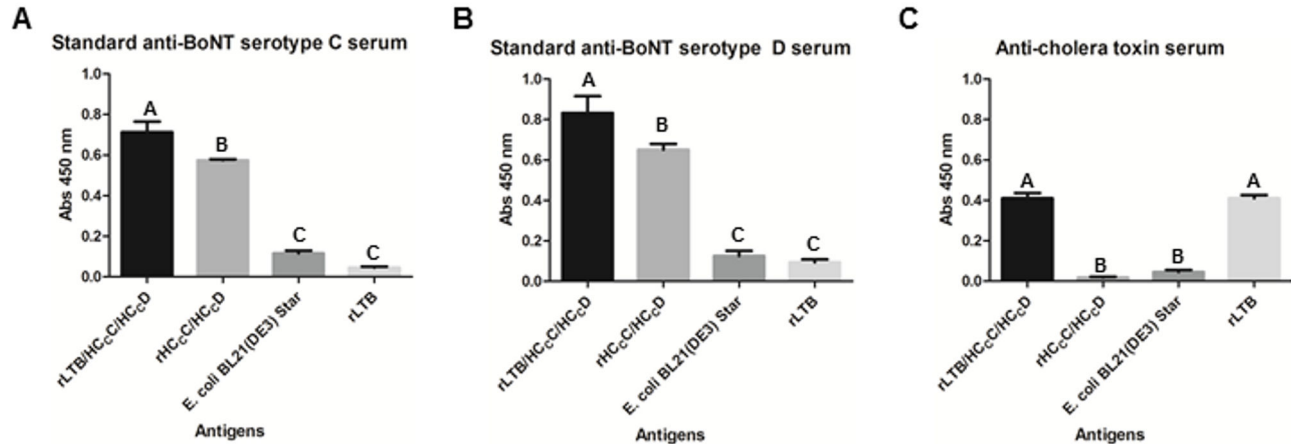

**Figure 4. Antigenicity evaluation of the recombinant chimeras by ELISA using standard anti-BoNT C and D sera.** Anti-BoNT C serum (A) showed that the rLTB/H<sub>c</sub>C/H<sub>c</sub>D antigen has more antigenic epitopes than rH<sub>c</sub>C/H<sub>c</sub>D, while anti-BoNT D serum (B) shows no difference between these two antigens. Anti-cholera toxin serum (C) was used to evaluate the antigenicity of the rLTB domain. Crude protein extract from *E. coli* BL21 (DE3) Star and purified rLTB were used as controls for the specificity of the three sera. Different letters above the bars (A, B, or C) indicate significant differences ( $p < 0.001$ ) according to Tukey's test. Absorbances (Abs) shown were measured at 450 nm wavelength.

doi: 10.1371/journal.pone.0069692.g004

3xGly used in this work, supporting the hypothesis that it is too short to allow the proper folding of H<sub>c</sub>C, and thus explaining the difference in the production of antibodies against toxins C and D in guinea pigs. Sakamoto et al. [38] described the influence of linker length and flexibility upon functionality of each domain of a recombinant chimera. Thus, it is possible that using a (Gly<sub>4</sub>Ser)<sub>3</sub> linker instead of only 3xGly may result in a stronger humoral immune response.

Despite different vaccination schedules, a remarkable discrepancy was observed between the results of the two animal models. While the chimeric vaccine induced high neutralizing antibodies levels in guinea pigs, the mice did not show a similar result. Although neutralization assays are not commonly performed with mouse sera, our data are not in accordance with the literature, as previous studies have shown that BALB/c and ICR mice can generate high levels of protection against several BoNTs [18,40]. One possible explanation for these experimental differences is the mouse strain that we used (Swiss Webster). This type of mouse is genetically heterogeneous and thus has the advantage of representing a varied population. In addition, it is not an enhanced T<sub>H</sub>2 responder strain, such as the BALB/c strain, which could explain the low antibody production against the antigens that were used. In contrast, guinea pigs are ideal model organisms for immunology tests against botulism and, thus, it is expected that high levels of immunological responses could be generated [41,42].

The rLTB/H<sub>c</sub>C/H<sub>c</sub>D chimera plus Al(OH)<sub>3</sub> induced high levels of neutralizing antibodies against both serotypes in guinea pigs. It is noteworthy that the Brazilian Ministry of Agriculture, Livestock and Food Supply determined that a vaccine against bovine botulism must induce minimum of 5 IU/mL and 2 IU/mL of anti-BoNT C and D neutralizing

**Table 2. Levels of neutralizing antibodies against BoNTs serotypes C and D in vaccinated mice and guinea pigs.**

| Vaccine formulation                                          | Mice <sup>a</sup> |                 | Guinea pigs <sup>a</sup> |                 |
|--------------------------------------------------------------|-------------------|-----------------|--------------------------|-----------------|
|                                                              | Serotype C        | Serotype D      | Serotype C               | Serotype D      |
| rLTB/H <sub>c</sub> C/H <sub>c</sub> D                       | 2 IU/mL           | 1 IU/mL         | ≤ 1 IU/mL                | ≤ 1 IU/mL       |
| rLTB/H <sub>c</sub> C/H <sub>c</sub> D + Al(OH) <sub>3</sub> | 2 IU/mL           | 2 IU/mL         | 5 IU/mL                  | 10 IU/mL        |
| rH <sub>c</sub> C/H <sub>c</sub> D + Al(OH) <sub>3</sub>     | 2 IU/mL           | 1 IU/mL         | ≤ 1 IU/mL                | ≤ 1 IU/mL       |
| Commercial vaccine                                           | 5 IU/mL           | 1 IU/mL         | 5 IU/mL                  | 3 IU/mL         |
| PBS                                                          | ND <sup>b</sup>   | ND <sup>b</sup> | ND <sup>b</sup>          | ND <sup>b</sup> |

<sup>a</sup> Values obtained by mouse neutralization bioassay.

<sup>b</sup> ND, not detectable.

antibodies, respectively, to be approved [28]. In our results from the mouse neutralization bioassay, the chimera rLTB/H<sub>c</sub>C/H<sub>c</sub>D plus Al(OH)<sub>3</sub> induced 5 IU/mL and 10 IU/mL for serotypes C and D, respectively, which is in accordance with the government's mandate. These values were comparable to the commercial vaccine and much higher than the other tested constructs. Takeda et al. [43] vaccinated ducks with a C/D mosaic toxoid (the H<sub>c</sub> portion consisted of serotype D) and obtained an average of 6 IU/mL, as determined by the mouse neutralization bioassay. Moreover, in our study, sera samples were obtained from guinea pigs three weeks after the last vaccination dose, in a manner similar to that of Takeda [43]. Nonetheless, we obtained an average of 7.5 IU/mL when considering both serotypes, which highlights the potential of our chimera. However, guinea pigs vaccinated with either rLTB/H<sub>c</sub>C/H<sub>c</sub>D alone or rH<sub>c</sub>C/H<sub>c</sub>D plus Al(OH)<sub>3</sub> did not display an appropriate humoral immune response.

The best results were obtained using the constructs containing LTB, a powerful adjuvant of humoral immune response [22,23,25,26]. The presence of LTB was essential for the development of a strong humoral immune response when it acted in synergism with Al(OH)<sub>3</sub>. Thus far, there have not been any works reporting a bivalent vaccine against botulism using a single polypeptide chain containing antigens and adjuvant. Additionally, there have not been any works evaluating LTB as an adjuvant in vaccines for preventing botulism. Conceição et al. [22] used LTB fused to the R1 antigen of *Mycoplasma hyopneumoniae* P97 adhesin to immunize mice without conventional adjuvants. This treatment induced the production of strong humoral and cellular immune responses, highlighting the use of LTB as an adjuvant of the immune response with antigens fused to its C-terminal portion. Indeed, the fusion of other antigens to the C-terminal end of LTB does not impair its biological activity, as was already reported [44,45].

Zeng et al. [46] published a similar work with a trivalent recombinant chimera against *C. perfringens* toxins, in which vaccines with fused toxins or co-administered antigens were demonstrated to have higher immunogenicity than antigens alone, eliciting a high titer of neutralizing antibodies. These results corroborate ours, in which synergism between LTB and Al(OH)<sub>3</sub>, together with vaccination with fused antigens, induced elevated titers of neutralizing antibodies. The large difference between the levels of neutralizing antibodies generated by vaccination of guinea pigs with Al(OH)<sub>3</sub> and either rLTB/H<sub>2</sub>C/H<sub>2</sub>D or rH<sub>2</sub>C/H<sub>2</sub>D support these findings and indicate that LTB indeed works as a systemic humoral immune response adjuvant, even though it was originally described to be a mucosal adjuvant [47]. Additionally, animals vaccinated with rLTB/H<sub>2</sub>C/H<sub>2</sub>D without conventional adjuvant developed low levels of neutralizing antibodies, suggesting that synergism between Al(OH)<sub>3</sub> and LTB is essential for the induction of an appropriate humoral immune response.

Both LTB and Al(OH)<sub>3</sub> are capable of inducing T<sub>H</sub>2-type responses [26,48], which in turn activate B cells through secretion of IL-4 and IL-5 [49], resulting in B cell proliferation and a strong humoral response consisting of the production of both s-IgA and IgG [50], as well as other isotypes. Aluminum hydroxide also creates a deposit of antigens, which extends the antigen exposure time to the immune cells, resulting in a stronger and more specific systemic response. Although the mechanism of action of LTB remains unclear, it has been shown that its activity stems from its ability to bind to GM1

ganglioside receptors [26,47], which are present on almost all mammalian cells, including antigen-presenting cells [51]. In this manner, LTB plays a key role by easing antigen uptake and presentation by dendritic cells, macrophages and, most importantly, B cells. Furthermore, LTB has been shown to up-regulate the expression of essential molecules for the development of an appropriate and strong immune response, such as the B7.1 and B7.2 co-stimulatory molecules. It also augments the expression of chemokine receptors and MHC class II on antigen-presenting cells [52]. Consequently, the adjuvant effects induced by both LTB and Al(OH)<sub>3</sub> act synergistically and complement each other, resulting in a stronger systemic humoral response. Thus, the rLTB/H<sub>2</sub>C/H<sub>2</sub>D molecule can be considered a "3 in 1" product, as it contains (1) a vaccine against cattle botulism serotype C, (2) a vaccine against cattle botulism serotype D, and (3) an adjuvant molecule, all in a single polypeptide chain.

In conclusion, we describe in this study the potential of the recombinant chimera rLTB/H<sub>2</sub>C/H<sub>2</sub>D as a novel strategy to prevent botulism in cattle by vaccination. The use of rLTB/H<sub>2</sub>C/H<sub>2</sub>D plus Al(OH)<sub>3</sub> could be considered a potential commercial product, although large-scale production must still be established. We also corroborated the results from other studies [22,25] establishing the potential of LTB as a humoral immune response adjuvant. Furthermore, our study also provides insights for studies with respect to other bacterial toxins.

## Acknowledgements

The authors thank workers at LANAGRO/MG for their great help without which this work could not be done. We also thank Mr. Wilson Pinto and Ms. Michele Santos for their priceless contribution at the laboratory and research center. We also would like to thank CNPq (processes n° 506819/2010-8 and n° 308437/2008-0), CAPES and FAPERGS.

## Author Contributions

Conceived and designed the experiments: LG CEC GM FC. Performed the experiments: LG CEC GM FS RA. Analyzed the data: LG CEC GM FS RA MM FL FC. Contributed reagents/materials/analysis tools: FC FL OD. Wrote the manuscript: LG CEC GM FS MM OD FC.

## References

- Smith LA (2009) Botulism and vaccines for its prevention. Vaccine 27: D33–D39. doi:10.1016/j.vaccine.2009.08.059. PubMed: 19837283.
- Simpson LL (2004) Identification of the major steps in botulinum toxin action. Annu Rev Pharmacol Toxicol 44: 167–193. doi:10.1146/annurev.pharmtox.44.101802.121554. PubMed: 14744243.
- Lobato CFF, Salvarani FM, Silva ROS, Souza AM, Lima CGRD et al. (2008) Botulism in ruminants being fed with poultry litter. Cienc Rural 38: 1176–1178. doi:10.1590/S0103-84782008000400046.
- Maboni F, Monego F, Matiuizzi da Costa M, Dutra I, Castagna de Vargas Palmira A (2010) Ocorrência De Botulismo Em Bovinos Confinados No Rio Grande Do Sul. Cienc Animal Bras 11: 962–965.
- Costa GMD, Salvador SC, Pereira MN (2008) Botulismo em bovinos leiteiros no Sul de Minas Gerais, Brasil. Cienc Rural 38: 2068–2071. doi:10.1590/S0103-84782008000700045.
- Döbereiner J, Tokarnia CH, Langenegger J, Dutra IS (1992) Epizootic botulism of cattle in Brazil. Dtsch Tierarztl Wochenschr 99: 188–190. PubMed: 1638962.
- Dutra IS, Döbereiner J, Rosa IV, Souza LAA, Nonato M (2001) Surtos de botulismo em bovinos no Brasil associados à ingestão de água contaminada. Pesqui Vet Bras 21: 43–48. doi:10.1590/S0100-736X2001000200002.
- Dutra IS, Döbereiner J, Souza AM (2005) Botulismo em bovinos de corte e leite alimentados com cama de frango. Pesqui Vet Bras 25: 115–119.
- Payne JH, Hogg RA, Otter A, Roest HI, Livesey CT (2011) Emergence of suspected type D botulism in ruminants in England and Wales (2001 to 2009), associated with exposure to broiler litter. Vet Rec 168: 640. doi:10.1136/vr.d1846. PubMed: 21652657.



10. Böhnelt H, Neufeld B, Gessler F (2005) Botulinum neurotoxin type B in milk from a cow affected by visceral botulism. *Vet J* 169: 124–125. doi:10.1016/j.tvjl.2004.01.006. PubMed: 15683776.
11. Livesey CT, Sharpe RT, Hogg RA (2004) Recent association of cattle botulism with poultry litter. *Vet Rec* 154: 734–735. PubMed: 15214523.
12. Steinman A, Galon N, Arazi A, Bar-Giora Y, Shpigel NY (2007) Cattle immune response to botulinum type D toxoid: results of a vaccination study. *Vaccine* 25: 7636–7640. doi:10.1016/j.vaccine.2007.08.051. PubMed: 17913314.
13. Lee J-C, Hwang H-J, Sakaguchi Y, Yamamoto Y, Arimitsu H et al. (2007) C terminal half fragment (50 kDa) of heavy chain components of Clostridium botulinum type C and D neurotoxins can be used as an effective vaccine. *Microbiol Immunol* 51: 445–455. PubMed: 17446685.
14. Hakami RM, Ruthel G, Stahl AM, Bavari S (2010) Gaining ground: assays for therapeutics against botulinum neurotoxin. *Trends Microbiol* 18: 164–172. doi:10.1016/j.tim.2010.02.001. PubMed: 20202845.
15. Turton K, Chaddock JA, Acharya KR (2002) Botulinum and tetanus neurotoxins: structure, function and therapeutic utility. *Trends Biochem Sci* 27: 552–558. doi:10.1016/S0968-0004(02)02177-1. PubMed: 12417130.
16. Ravichandran E, Al-Saleem FH, Ancharski DM, Elias MD, Singh AK et al. (2007) Trivalent vaccine against botulinum toxin serotypes A, B, and E that can be administered by the mucosal route. *Infect Immun* 75: 3043–3054. doi:10.1128/IAI.01893-06. PubMed: 17371853.
17. Byrne MP, Smith LA (2000) Development of vaccines for prevention of botulism. *Biochimie* 82: 955–966. doi:10.1016/S0300-9084(00)01173-1. PubMed: 11086225.
18. Baldwin MR, Tepp WH, Przedpelski A, Pier CL, Bradshaw M et al. (2008) Subunit vaccine against the seven serotypes of botulism. *Infect Immun* 76: 1314–1318. doi:10.1128/IAI.01025-07. PubMed: 18070903.
19. Dux MP, Huang J, Barent R, Inan M, Swanson ST et al. (2011) Purification of a recombinant heavy chain fragment C vaccine candidate against botulinum serotype C neurotoxin [rBoNTC(H(c))] expressed in *Pichia pastoris*. *Protein Expr Purif* 75: 177–185. doi:10.1016/j.pep.2010.09.016. PubMed: 20933089.
20. Henkel JS, Tepp WH, Przedpelski A, Fritz RB, Johnson EA et al. (2011) Subunit vaccine efficacy against Botulinum neurotoxin subtypes. *Vaccine* 29: 7688–7695. doi:10.1016/j.vaccine.2011.07.134. PubMed: 21839134.
21. Webb RP, Smith TJ, Wright PM, Montgomery VA, Meagher MM et al. (2007) Protection with recombinant Clostridium botulinum C1 and D binding domain subunit (Hc) vaccines against C and D neurotoxins. *Vaccine* 25: 4273–4282. doi:10.1016/j.vaccine.2007.02.081. PubMed: 17395341.
22. Conceição FR, Moreira AN, Dellagostin OA (2006) A recombinant chimera composed of R1 repeat region of *Mycoplasma hyopneumoniae* P97 adhesin with *Escherichia coli* heat-labile enterotoxin B subunit elicits immune response in mice. *Vaccine* 24: 5734–5743. doi:10.1016/j.vaccine.2006.04.036. PubMed: 16730864.
23. Grassmann AA, Félix SR, dos Santos CX, Amaral MG, Seixas Neto ACP et al. (2012) Protection against lethal leptospirosis after vaccination with LipL32 coupled or coadministered with the B subunit of *Escherichia coli* heat-labile enterotoxin. *Clin Vaccine Immunol* 19: 740–745. doi:10.1128/CVI.05720-11. PubMed: 22379066.
24. Berzofsky JA, Ahlers JD, Belyakov IM (2001) Strategies for designing and optimizing new generation vaccines. *Nat Rev Immunol* 1: 209–219. doi:10.1038/35105075. PubMed: 11905830.
25. Fischer G, Conceição FR, Leite FPL, Moraes CM, Ferreira LN et al. (2010) Recombinant *Escherichia coli* heat-labile enterotoxin B subunit humoral adjuvant effect depends on dose and administration route. *World J Microbiol Biotechnol* 26: 489–495. doi:10.1007/s11274-009-0195-z.
26. da Hora VP, Conceição FR, Dellagostin OA, Doolan DL (2011) Non-toxic derivatives of LT as potent adjuvants. *Vaccine* 29: 1538–1544. doi:10.1016/j.vaccine.2010.11.091. PubMed: 21163247.
27. Sambrook J, Russel DW (2001) Molecular cloning. Cold Spring Harbor, NY: Cold Spring Harbor Laboratory Press.
28. Brasil (2002) Ministério da Agricultura. Instrução normativa n. 23. Diário Oficial da União.
29. Mansour AA, Mousavi SL, Rasooli I, Nazarian S, Amani J et al. (2010) Cloning, high level expression and immunogenicity of 1163-1256 residues of C-terminal heavy chain of C. botulinum neurotoxin type E. *Biol J Int Assoc Biol Stand* 38: 260–264.
30. Yari K, Fatemi SS-A, Tavallaei M (2012) High level expression of recombinant BoNT/A-Hc by high cell density cultivation of *Escherichia coli*. *Bioprocess Biosyst Eng* 35: 407–414. doi:10.1007/s00449-011-0579-y. PubMed: 21833619.
31. Woodward LA, Arimitsu H, Hirst R, Oguma K (2003) Expression of HC subunits from Clostridium botulinum types C and D and their evaluation as candidate vaccine antigens in mice. *Infect Immun* 71: 2941–2944. doi:10.1128/IAI.71.5.2941-2944.2003. PubMed: 12704175.
32. Arimitsu H, Lee J-C, Sakaguchi Y, Hayakawa Y, Hayashi M et al. (2004) Vaccination with recombinant whole heavy chain fragments of Clostridium botulinum Type C and D neurotoxins. *Clin Diagn Lab Immunol* 11: 496–502. PubMed: 15138174.
33. Yari K, Fatemi SS-A, Tavallaei M, Tavallaei M (2010) Optimization of the BoNT/A-Hc expression in recombinant *Escherichia coli* using the Taguchi statistical method. *Biotechnol And Appl Biochemistry* 56: 35–42. doi:10.1042/BA20090315. PubMed: 20412050.
34. Bie C-Q, Yang D-H, Liang X-J, Tang S-H (2010) Construction of non-covalent single-chain Fv dimers for hepatocellular carcinoma and their biological functions. *World J Hepatol* 2: 185–191. PubMed: 21160994.
35. Menezes MA, Aires KA, Ozaki CY, Ruiz RM, Pereira MC et al. (2011) Cloning approach and functional analysis of anti-intimin single-chain variable fragment (scFv). *BMC Res Notes* 4: 30. doi:10.1186/1756-0500-4-30. PubMed: 21288327.
36. Sakamoto S, Pongkitwitoon B, Nakamura S, Sasaki-Tabata K, Tanizaki Y et al. (2011) Construction, expression, and characterization of a single-chain variable fragment antibody against 2,4-dichlorophenoxyacetic acid in the hemolymph of silkworm larvae. *Appl Biochem Biotechnol* 164: 715–728. doi:10.1007/s12010-011-9168-4. PubMed: 21279468.
37. Skrlj N, Vranac T, Popović M, CurinŠerbec V, Dolinar M (2011) Specific binding of the pathogenic prion isoform: development and characterization of a humanized single-chain variable antibody fragment. *PLoS one* 6: e15783.
38. Sakamoto S, Tanizaki Y, Pongkitwitoon B, Tanaka H, Morimoto S (2011) A chimera of green fluorescent protein with single chain variable fragment antibody against ginsenosides for fluorescence-linked immunosorbent assay. *Protein Expr Purif* 77: 124–130. doi:10.1016/j.pep.2011.01.010. PubMed: 21277981.
39. Dang Z, Feng J, Yagi K, Sugimoto C, Li W et al. (2012) Mucosal Adjuvanticity of Fibronectin-Binding Peptide (FBP) Fused with *Echinococcus multilocularis* Tetraspanin 3: Systemic and Local Antibody Responses. *PLOS Neglected Trop Dis* 6: e1842. doi:10.1371/journal.pntd.0001842. PubMed: 23029596.
40. Yu Y-Z, Li N, Zhu H-Q, Wang R-L, Du Y et al. (2009) The recombinant Hc subunit of *Clostridium botulinum* neurotoxin serotype A is an effective botulism vaccine candidate. *Vaccine* 27: 2816–2822. doi:10.1016/j.vaccine.2009.02.091. PubMed: 19428892.
41. Gelzleichter TR, Myers MA, Menton RG, Niemuth NA, Matthews MC et al. (1999) Protection against botulinum toxins provided by passive immunization with botulinum human immune globulin: evaluation using an inhalation model. *J Appl Toxicol JAT* 19 Suppl 1: S35–S38. doi:10.1002/(SICI)1099-1263(199912)19:1+. PubMed: 10594898.
42. Shone C, Agostini H, Clancy J, Gu M, Yang H-H et al. (2009) Bivalent recombinant vaccine for botulinum neurotoxin types A and B based on a polypeptide comprising their effector and translocation domains that is protective against the predominant A and B subtypes. *Infect Immun* 77: 2795–2801. doi:10.1128/IAI.01252-08. PubMed: 19398544.
43. Takeda M, Kasai H, Torii Y, Mukamoto M, Kohda T et al. (2006) Protective effect of botulinum C/D mosaic toxoid against avian botulism. *J Vet Med Sci*, 68: 325–30 / The Japanese Society of Veterinary Science 68: 325–330. PubMed: 16679722.
44. Liljeqvist S, Ståhl S, Andréoni C, Binz H, Uhlén M et al. (1997) Fusions to the cholera toxin B subunit: influence on pentamerization and GM1 binding. *J Immunol Methods* 210: 125–135. doi:10.1016/S0022-1759(97)00170-1. PubMed: 9520296.
45. Arakawa T, Yu J, Chong DKX, Hough J, Engen PC et al. (1998) A plant-based cholera toxin B subunit-insulin fusion protein protects against the development of autoimmune diabetes. *Nat Biotechnol* 16: 934–938. doi:10.1038/nbt1098-934. PubMed: 9788349.
46. Zeng J, Deng G, Wang J, Zhou J, Liu X et al. (2011) Potential protective immunogenicity of recombinant Clostridium perfringens  $\alpha$ - $\beta$ 2- $\beta$ 1 fusion toxin in mice, sows and cows. *Vaccine* 29: 5459–5466. doi:10.1016/j.vaccine.2011.05.059. PubMed: 21641956.
47. Freytag LC, Clements JD (2005) Mucosal adjuvants. *Vaccine* 23: 1804–1813. doi:10.1016/j.vaccine.2004.11.010. PubMed: 15734046.
48. Hunter RL (2002) Overview of vaccine adjuvants: present and future. *Vaccine* 20 Suppl 3: S7–S12. doi:10.1016/S0264-410X(02)00164-0. PubMed: 12184369.
49. Hubbell JA, Thomas SN, Swartz MA (2009) Materials engineering for immunomodulation. *Nature* 462: 449–460. doi:10.1038/nature08604. PubMed: 19940915.
50. Petrovska L, Lopes L, Simmons CP, Pizsa M, Dougan G et al. (2003) Modulation of dendritic cell endocytosis and antigen processing pathways by *Escherichia coli* heat-labile enterotoxin and mutant

- derivatives. *Vaccine* 21: 1445–1454. doi:10.1016/S0264-410X(02)00696-5. PubMed: 12615441.
51. Sanchez J, Holmgren J (2011) Cholera toxin - a foe & a friend. *Indian J Med Res* 133: 153–163. PubMed: 21415489.
52. George-chandy A, Eriksson K, Lebens M, Nordström I, Schön E et al. (2001) Cholera Toxin B Subunit as a Carrier Molecule Promotes

Antigen Presentation and Increases CD40 and CD86 Expression on Antigen-Presenting Cells. *Infect Immun* 69: 5716–5725. doi:10.1128/IAI.69.9.5716-5725.2001. PubMed: 11500448.
